# Supplementary material for: Development and Validation of a Patient-Reported Outcome Measure of the Impact of Chronic Hand Eczema on Health-Related Quality of Life: the Hand Eczema Impact Scale (HEIS)
Source: PubMed Central journal article supplement — Dermatol Ther (Heidelb). 2024 Oct 21;14(11):3047–70. doi: 10.1007/s13555-024-01267-0 (PMC11557818; doi:10.1007/s13555-024-01267-0), 2024-10-21
Supplement: 13555_2024_1267_MOESM1_ESM.pdf [file 13555_2024_1267_MOESM1_ESM.pdf]

# Development and validation of a patient-reported outcome measure of the impact of chronic hand eczema on health-related quality of life: the Hand Eczema Impact Scale (HEIS)

Elke Weisshaar (0000-0002-7016-0224), Yasemin Topal Yuksel (0000-0003-1289-1827), Tove Agner (0000-0002-7543-8299), Lotte Seiding Larsen (0009-0009-9374-2196), Laura Grant (0000-0002-4291-931X), Rob Arbuckle (000-0003-0345-2523), Amy M. Jones (0000-0003-3645-746X), Piper Fromy (0009-0007-7751-7226), Cherry Lou Balita-Crisostomo (0000-0003-0080-8774), Nanna Nyholm Mathiasen (0009-0008-7783-5926), Henrik Thoning, Christian Apfelbacher (0000-0003-3805-8219)

## Affiliations

Elke Weisshaar: University Hospital Heidelberg, Division of Occupational Dermatology, Department of Dermatology, Heidelberg, Germany; Yasemin Topal Yuksel: Department of Dermatology, Bispebjerg and Frederiksberg Hospital, Copenhagen University, Copenhagen, Denmark; Tove Agner: Department of Dermatology, Bispebjerg Hospital, University of Copenhagen, Copenhagen, Denmark; Lotte Seiding Larsen: LEO Pharma A/S, Ballerup, Denmark; Laura Grant: Adelphi Values, Patient-Centered Outcomes, Bollington, Cheshire, UK; Rob Arbuckle: Adelphi Values Ltd, Patient-Centered Outcomes, Bollington, Cheshire, UK; Amy Jones: Adelphi Values Ltd, Patient-Centered Outcomes, Bollington, Cheshire, UK; Piper Fromy: Adelphi Values Ltd, Patient-Centered Outcomes, Bollington, Cheshire, UK; Cherry Lou Balita-Crisostomo: LEO Pharma A/S, Ballerup, Denmark; Nanna Mathiasen: LEO Pharma A/S, Ballerup, Denmark; Henrik Thoning: LEO Pharma A/S, Ballerup, Denmark; Christian Apfelbacher: Institute of Social Medicine and Health Systems Research, Medical Faculty, Otto von Guericke University, Magdeburg, Germany

Corresponding author: Laura Grant, Adelphi Values, Grimshaw Lane, Bollington, Cheshire, SK10 5JB ([Laura.Grant@adelphivalues.com](mailto:Laura.Grant@adelphivalues.com))

## Supplementary Tables

**Table S1. Independent ethics committee (IEC)/institutional review board (IRB) committee and study investigators for the phase 2b trial**

| <b>IEC/IRB Committee<br/>Chair, Name of Committee, and Reference<br/>Number</b>                                                                                                                                         | <b>Investigator Site</b>                                                                                                                                                                      |
|-------------------------------------------------------------------------------------------------------------------------------------------------------------------------------------------------------------------------|-----------------------------------------------------------------------------------------------------------------------------------------------------------------------------------------------|
| <b>Denmark</b>                                                                                                                                                                                                          |                                                                                                                                                                                               |
| <p><b>Chair: Susanne Langer</b><br/>The Regional Committees on Health Research Ethics for Capital Region of Denmark – committee C, The Capital Region of Denmark Center for Kongens Vænge 2 3400 Hillerød / Denmark</p> | <p><b>Dr. Tove Agner</b><br/>Bispebjerg Hospital, Dermato-Venerologisk Afdeling, Nielsine Nielsens Vej, opg. 9, 1. sal, DK-2400 København NV Denmark</p>                                      |
| <p><b>Chair: CEC</b></p>                                                                                                                                                                                                | <p><b>Dr. Mette Sommerlund</b><br/>Aarhus Universitetshospital Dermato-Venerologisk Afdeling Palle Juul Jensens Boulevard 99 DK-8200 Aarhus N Denmark</p>                                     |
| <p><b>Chair: CEC</b></p>                                                                                                                                                                                                | <p><b>Ledende overlæge Claus Zachariae</b><br/>Herlev og Gentofte Hospital Afdeling for Allergi, hud og kønssygdomme Gentofte Hospital Gentofte Hospitalsvej 15, st 2900 Hellerup Denmark</p> |
| <p><b>Chair: CEC</b></p>                                                                                                                                                                                                | <p><b>Professor Jacob Thyssen</b><br/>Sanos Clinic Herlev Hovedgade 82 2730 Herlev Denmark</p>                                                                                                |
| <p><b>Chair: CEC</b></p>                                                                                                                                                                                                | <p><b>Afdelingslæge Kristina Ibler</b><br/>Dermatologisk afdeling Roskilde Sygehus Sygehusvej 10, indgang 5 4000 Roskilde Denmark</p>                                                         |
| <b>Germany</b>                                                                                                                                                                                                          |                                                                                                                                                                                               |
| <p><b>Chair: PD Dr. med. H. Theilen</b><br/>Ethikkommission an der TU Dresden<br/>Postanschrift: Fetscherstraße 74 1307 Dresden</p>                                                                                     | <p><b>Prof. Dr. med. Andrea Bauer (200-0033)</b><br/>Universitätsklinikum Carl Gustav Carus Dresden Klinik und Poliklinik für Dermatologie, Fetscherstr. 74 1109 Dresden</p>                  |
| <p><b>Chair: Prof. Dr. rer. nat. Hans-Joachim Trampisch</b><br/>Ethik-Kommission der Medizinischen Fakultät der Ruhr-Universität Bochum<br/>Gesundheitscampus 33 44801 Bochum</p>                                       | <p><b>PD Dr. med. Heinrich Dickel (201-0041)</b><br/>Ruhr-Universität Bochum Klinik für Dermatologie, Venerologie und Allergologie St. Josef-Hospital Gudrunstr. 56 44791 Bochum</p>          |
| <p><b>Chair: Prof. Dr. med. Petra Thürmann</b><br/>Ethik-Kommission der Universität Witten/Herdecke, Alfred-Herrhausen-Str. 50 58448 Witten</p>                                                                         | <p><b>Prof. Dr. med. Thomas Dirschka (202-0036)</b><br/>CentroDerm Study Center, Heinz-Fangman-Str. 57 42287 Wuppertal</p>                                                                    |
| <p><b>Chair: Prof. Dr. med. Gerlinde Egerer</b></p>                                                                                                                                                                     | <p><b>Dr. med. Nicolas Leitz (203-0995)</b></p>                                                                                                                                               |

**Table S1. Independent ethics committee (IEC)/institutional review board (IRB) committee and study investigators for the phase 2b trial**

| <b>IEC/IRB Committee<br/>Chair, Name of Committee, and Reference Number</b>                                                                                                                                         | <b>Investigator Site</b>                                                                                                                                                                         |
|---------------------------------------------------------------------------------------------------------------------------------------------------------------------------------------------------------------------|--------------------------------------------------------------------------------------------------------------------------------------------------------------------------------------------------|
| Ethik-Kommission bei der Landesärztekammer Baden-Württemberg Liebknechtstr. 33, 70565 Stuttgart                                                                                                                     | Hautarztpraxis Dres. Leitz und Kollegen, Marienstraße 1 70178 Stuttgart                                                                                                                          |
| <b>Chair: Prof. Dr. Wolfgang Eisenmenger/ Prof. Dr. Rudolf M. Huber / Prof. Dr. Clemens Wendtner</b><br>Ethik-kommission bei der Medizinischen Fakultät der LMU München Pettenkoferstr. 8a D-80336 München          | <b>Prof. Dr. med. Franziska Rueff (204-0441)</b><br>Klinik und Poliklinik für Dermatologie und Allergologie Klinikum der Universität München, Frauenlobstrasse 9-11 D-80337 München              |
| <b>Chair: Prof. Dr. med. Ulrich Brandl</b><br>Ethik-Kommission der Friedrich-Schiller-Universität Jena Bachstraße 18 07740 Jena                                                                                     | <b>PD Dr. med. Sibylle Schliemann (205-0677)</b><br>University Hospital Jena Department of Dermatology                                                                                           |
| <b>Chair: Prof. Dr. med. Gerlinde Egerer</b><br>Ethik-Kommission bei der Landesärztekammer Baden-Württemberg Liebknechtstr. 33, 70565 Stuttgart                                                                     | <b>Dr. med. Beate Schwarz (206-1216)</b><br>Studienzentrum Dr.Beate Schwarz, Bismarckstr. 49 89129 Langenau                                                                                      |
| <b>Chair: PD Dr. Friedrich Meier</b><br>Ethik-kommission der Landesärztekammer Thüringen Im Semmicht 33 07751 Jena                                                                                                  | <b>Sabine Sell (207-0163)</b><br>SRH Wald-Klinikum Gera GmbH Zentrum für klinische Studien                                                                                                       |
| <b>Chair: Univ.-Prof. Dr. med. Dipl. Ing. Stephan Letzel</b><br>Landesärztekammer Rheinland-Pfalz Postfach 29 26 55019 Mainz                                                                                        | <b>Prof. Dr. med. Petra Staubach-Renz (208-0034)</b><br>CRC Clinical Research Center Department of Dermatology and Allergy Johannes Gutenberg-University Langenbeckstr. 1 55131 Mainz            |
| <b>Chair: Prof. Dr. med. K. Thomas Moesta</b><br>Landesamt für Gesundheit und Soziales (LaGeSo) Geschäftsstelle der Ethik-Kommission des Landes Berlin Dienstgebäude Fehrbelliner Platz 1 10707 Berlin              | <b>Prof. Dr. med. Maritta Worm (209-0003)</b><br>Charité - Universitätsmedizin Berlin (Campus Charité Mitte) Klinik für Dermatologie, Venerologie und Allergologie, Allergologie und Immunologie |
| <b>Chair: Univ. Prof. Dr. med. Dipl. Ing. Stephan Letzel</b><br>Landesärztekammer Rheinland-Pfalz Postfach 29 26 55019 Mainz                                                                                        | <b>Dr. med. Ralph von Kiedrowski (210-0793)</b><br>CMS <sup>3</sup> - Company for Medical Study & Service Selters, Kirchstr. 1, 56242 Selters (Westerwald)                                       |
| <b>Chair: Prof. Dr. med. Thomas Hohlfeld</b><br>Universitätsklinikum Düsseldorf Ethikkommission an der Med. Fakultät der HHU Düsseldorf Kinderklinik Gebäude 13.41, Etage 03, Raum 34 Moorenstr. 5 40225 Düsseldorf | <b>PD Dr. med. Stephan Meller (211-0403)</b><br>Universitätsklinikum Düsseldorf, Klinik für Dermatologie, Moorenstrasse 5 40225 Düsseldorf                                                       |
| <b>Chair: Prof. Dr. med. Gerhard Hintze (Ethik-Kommission 1), Prof. Dr. med. Diether Ludwig (EthikKommission 2)</b>                                                                                                 | <b>Dr. med. Harald Brüning (212-1238)</b><br>MVZ DermaKiel GmbH, Schönberger Str. 72-74 24148 Kiel                                                                                               |

**Table S1. Independent ethics committee (IEC)/institutional review board (IRB) committee and study investigators for the phase 2b trial**

| <b>IEC/IRB Committee<br/>Chair, Name of Committee, and Reference Number</b>                                                                                                         | <b>Investigator Site</b>                                                                                                                                                          |
|-------------------------------------------------------------------------------------------------------------------------------------------------------------------------------------|-----------------------------------------------------------------------------------------------------------------------------------------------------------------------------------|
| Ethikkommissionen bei der Ärztekammer Schleswig-Holstein Bismarckallee 8-12 23795 Bad Segeberg                                                                                      |                                                                                                                                                                                   |
| <b>Chair: Prof. Dr. med. Gerlinde Egerer</b><br>Ethik-Kommission bei der Landesärztekammer Baden-Württemberg Liebnechtstr. 33, 70565 Stuttgart                                      | <b>Prof. Dr. med. Christian Termeer (213-0220)</b><br>Hautarztpraxis am Löwenmarkt, Prof. Dr. med. Christian Termeer, Rennstraße 2 70499 Stuttgart-Weilimdorf                     |
| <b>Chair: Prof. Dr. med. Rolf Stahl</b><br>Ethik-Kommission der Ärztekammer Hamburg Weidestr. 122b 22083 Hamburg                                                                    | <b>Prof. Dr. med. Matthias Augustin (215-1004)</b><br>Universitätsklinikum Hamburg Eppendorf IVDP-CeDeF, Martinistrasse 52, Geb. W 38, 5OG 20246 Hamburg                          |
| <b>Chair: Prof. Dr. jur. Friedhelm Hase</b><br>Ethikkommission des Landes Bremen, Institut für Klinische Pharmakologie Klinikum Bremen-Mitte gGmbH St.-Jürgen- Str. 1, 28177 Bremen | <b>Dr. med. Michael Sachse (217-1287)</b><br>Klinikum Bremerhaven Reickenheide gGmbH Klinik für Dermatologie, Allergologie und Phlebologie, Postbrookstraße 103 27574 Bremerhaven |
| <b>United States</b>                                                                                                                                                                |                                                                                                                                                                                   |
| <b>Chair: Veit Glenn JD, CIP</b><br>WIRB/Copernicus Group IRB 5000 CentreGreen Way Suite 200 27513 Cary, NC, USA                                                                    | <b>Benjamin Ehst</b><br>Oregon Medical Research Center                                                                                                                            |
|                                                                                                                                                                                     | <b>Vivian Shi</b><br>Banner-University Medical Center Tucson Campus                                                                                                               |
|                                                                                                                                                                                     | <b>Jose Mendez</b><br>Direct Helpers Research Center (DHRC)                                                                                                                       |
|                                                                                                                                                                                     | <b>Christopher Smith</b><br>Smith Allergy & Asthma Specialists of Central New                                                                                                     |
| <b>Chair: Schuff Kathryn MD, MCR</b><br>Oregon Health & Science University IRB 3181 S.W. Sam Jackson Park Road Mail Code L106RI Portland, OR 97239-3098                             | <b>John Hanifin</b><br>Oregon Health & Science University                                                                                                                         |

**Table S2. Summary of concepts reported across sources used for item development**

| Domain/Concept                            | Reported in literature/blog review | Reported in concept elicitation interviews with patients/clinicians | Included in the 10-item HEIS instrument |
|-------------------------------------------|------------------------------------|---------------------------------------------------------------------|-----------------------------------------|
| <b>Domain: Sleep</b>                      |                                    |                                                                     |                                         |
| Sleep quality                             | ✓                                  | ✓                                                                   | ✓                                       |
| Sleep duration                            | ✓                                  | ✓                                                                   |                                         |
| <b>Domain: Physical functioning</b>       |                                    |                                                                     |                                         |
| Infection                                 | ✓                                  | ✓                                                                   |                                         |
| Restricted movement of hands              | ✓                                  | ✓                                                                   | *                                       |
| Touching objects                          |                                    | ✓                                                                   | ✓                                       |
| Holding/gripping objects                  |                                    | ✓                                                                   | ✓                                       |
| Physical deformation of the hands         | ✓                                  |                                                                     |                                         |
| <b>Domain: Social</b>                     |                                    |                                                                     |                                         |
| Family relationships                      | ✓                                  | ✓                                                                   |                                         |
| Lack of understanding                     | ✓                                  |                                                                     |                                         |
| Relationship with friends                 |                                    | ✓                                                                   |                                         |
| Sexual/intimate relationships             |                                    | ✓                                                                   |                                         |
| <b>Domain: Activities of daily living</b> |                                    |                                                                     |                                         |
| Difficulty washing hair                   | ✓                                  | ✓                                                                   | *                                       |
| Difficulty dressing                       | ✓                                  | ✓                                                                   | ✓                                       |
| Domestic chores                           | ✓                                  | ✓                                                                   | ✓                                       |
| Avoidance of soaps/chemicals              |                                    | ✓                                                                   | ✓                                       |
| <b>Domain: Emotional</b>                  |                                    |                                                                     |                                         |
| Embarrassment/self-consciousness          | ✓                                  | ✓                                                                   | ✓                                       |
| Frustration/annoyance                     | ✓                                  | ✓                                                                   |                                         |
| Dislike in appearance of the hands        | ✓                                  | ✓                                                                   | ✓                                       |
| Sadness/depression                        | ✓                                  | ✓                                                                   |                                         |
| Fear of public opinion                    | ✓                                  | ✓                                                                   | *                                       |
| Low self-esteem                           | ✓                                  | ✓                                                                   | *                                       |
| Inability to cope (coping)                | ✓                                  |                                                                     |                                         |
| Loneliness                                | ✓                                  |                                                                     |                                         |
| Helplessness                              | ✓                                  |                                                                     |                                         |
| <b>Domain: Work</b>                       |                                    |                                                                     |                                         |
| Inability to complete work tasks          | ✓                                  | ✓                                                                   |                                         |
| Ending employment/chance in career        | ✓                                  | ✓                                                                   |                                         |

**Table S2. Summary of concepts reported across sources used for item development**

| Domain/Concept                            | Reported in literature/blog review | Reported in concept elicitation interviews with patients/clinicians | Included in the 10-item HEIS instrument |
|-------------------------------------------|------------------------------------|---------------------------------------------------------------------|-----------------------------------------|
| Stigma/lack of understanding in workplace | ✓                                  | ✓                                                                   |                                         |
| Missed days of work                       | ✓                                  | ✓                                                                   |                                         |

✓=concept reported in source, ✓=concept included, \*=concept indirectly assessed by other items  
 HEIS=Hand Eczema Impact Scale

**Table S3. Demographic and clinical characteristics of interview participants**

| <b>Description</b>                                           |                                    | <b>Number of interview participants (N=20)</b> |
|--------------------------------------------------------------|------------------------------------|------------------------------------------------|
| Gender, n (%)                                                | Female                             | 14 (70.0%)                                     |
|                                                              | Male                               | 6 (30.0%)                                      |
| Age                                                          | Mean (range)                       | 46.6 (18-69)                                   |
| Ethnicity, n (%)                                             | Hispanic or Latino                 | 3 (15.0%)                                      |
|                                                              | Non-Hispanic or Latino             | 17 (85.0%)                                     |
| Race, n (%)                                                  | White/Caucasian                    | 13 (65.0%)                                     |
|                                                              | Black/African American             | 5 (25.0%)                                      |
|                                                              | Asian or Pacific Islander          | 1 (5.0%)                                       |
|                                                              | Indian                             | 1 (5.0%)                                       |
| Work status, n (%)                                           | Working full or part time          | 16 (80.0%)                                     |
|                                                              | Retired                            | 2 (10.0%)                                      |
|                                                              | Full time homemaker                | 1 (5.0%)                                       |
|                                                              | Unemployed                         | 1 (5.0%)                                       |
| Occupation, n (%)                                            | Office/administration work         | 6 (30.0%)                                      |
|                                                              | Unspecified                        | 5 (25.0%)                                      |
|                                                              | Physician                          | 1 (5.0%)                                       |
|                                                              | Waitress                           | 1 (5.0%)                                       |
|                                                              | Cleaner                            | 1 (5.0%)                                       |
|                                                              | Eye technician                     | 1 (5.0%)                                       |
|                                                              | Horse groomer                      | 1 (5.0%)                                       |
|                                                              | Nurse                              | 1 (5.0%)                                       |
|                                                              | Sales                              | 1 (5.0%)                                       |
|                                                              | Housekeeper                        | 1 (5.0%)                                       |
|                                                              | Chef                               | 1 (5.0%)                                       |
| Highest level of education, n (%)                            | Some high school                   | 3 (15.0%)                                      |
|                                                              | Completed high school              | 5 (25.0%)                                      |
|                                                              | Some years of college              | 3 (15.0%)                                      |
|                                                              | Undergraduate or bachelor's degree | 8 (40.0%)                                      |
|                                                              | Graduate degree                    | 1 (5.0%)                                       |
| Clinician reported hand eczema subtype, n (%)                | Atopic hand eczema                 | 9 (45.0%)                                      |
|                                                              | Allergic contact dermatitis        | 6 (30.0%)                                      |
|                                                              | Irritant contact dermatitis        | 5 (25.0%)                                      |
| Physician Global Assessment of Disease Severity (PGA), n (%) | Mild                               | 5 (25.0%)                                      |
|                                                              | Moderate                           | 9 (45.0%)                                      |
|                                                              | Severe                             | 6 (30.0%)                                      |
| Patient Global Assessment of Disease Severity (PaGA), n (%)  | Mild                               | 5 (25.0%)                                      |
|                                                              | Moderate                           | 7 (35.0%)                                      |

**Table S3. Demographic and clinical characteristics of interview participants**

| Description                                       |                     | Number of interview participants (N=20) |
|---------------------------------------------------|---------------------|-----------------------------------------|
|                                                   | <b>Severe</b>       | 7 (35.0%)                               |
|                                                   | <b>Missing</b>      | 1 (5.0%)                                |
| <b>Time since diagnosis of hand eczema, n (%)</b> |                     |                                         |
|                                                   | <b>&lt;1 year</b>   | 1 (5.0%)                                |
|                                                   | <b>1-4 years</b>    | 3 (15.0%)                               |
|                                                   | <b>5-10 years</b>   | 9 (45.0%)                               |
|                                                   | <b>11-15 years</b>  | 2 (10.0%)                               |
|                                                   | <b>&gt;15 years</b> | 5 (25.0%)                               |

**Table S4. Polychoric correlations between HEIS items at Week 4 (N=242)**

| HEIS Items                       | 1    | 2    | 3    | 4    | 5    | 6    | 7    | 8    |
|----------------------------------|------|------|------|------|------|------|------|------|
| Item 1: Quality of sleep         | -    |      |      |      |      |      |      |      |
| Item 2: Ability to use products* | 0.72 | -    |      |      |      |      |      |      |
| Item 3: Felt embarrassed**       | 0.62 | 0.54 | -    |      |      |      |      |      |
| Item 4: Dislike appearance**     | 0.69 | 0.58 | 0.88 | -    |      |      |      |      |
| Item 5: Hard to do housework*    | 0.68 | 0.88 | 0.53 | 0.61 | -    |      |      |      |
| Item 6: Hard to hold objects*    | 0.76 | 0.71 | 0.55 | 0.62 | 0.75 | -    |      |      |
| Item 7: Hard to wash yourself*   | 0.73 | 0.79 | 0.51 | 0.55 | 0.81 | 0.77 | -    |      |
| Item 8: Feel frustrated          | 0.71 | 0.62 | 0.85 | 0.85 | 0.63 | 0.64 | 0.62 | -    |
| Item 9: Hard to work             | 0.78 | 0.65 | 0.55 | 0.57 | 0.69 | 0.76 | 0.69 | 0.61 |

**Note.** \* Items share the hypothesized HEIS PDAL domain. \*\* Items share the hypothesized Emb HEIS domain.

Correlations are colour coordinated in accordance with the following colour coding:

<0.40

|                 |
|-----------------|
| 0.40 ≤ x < 0.50 |
| 0.50 ≤ x < 0.60 |
| 0.60 ≤ x < 0.70 |
| 0.70 ≤ x < 0.80 |
| ≥0.80           |



**Table S5. Factor loadings for the HEIS (Model A & Model B solutions) at Week 4 in the psychometric analysis population**

| HEIS Items                      | Model A – Unidimensional | Model B - Bifactor |       |
|---------------------------------|--------------------------|--------------------|-------|
|                                 | Factor 1                 | General            | PDAL  |
| Item 1: Quality of sleep        | 0.837                    | 0.888              |       |
| Item 2: Ability to use products | 0.880                    | 0.719              | 0.567 |
| Item 3: Felt embarrassed        | 0.874                    | 0.811              |       |
| Item 4: Dislike appearance      | 0.889                    | 0.842              |       |
| Item 5: Hard to do housework    | 0.896                    | 0.722              | 0.620 |
| Item 6: Hard to hold objects    | 0.835                    | 0.800              | 0.296 |
| Item 7: Hard to wash yourself   | 0.839                    | 0.744              | 0.451 |
| Item 8: Feel frustrated         | 0.886                    | 0.949              |       |
| Item 9: Hard to work            | 0.796                    | 0.849              |       |

HEIS=Hand Eczema Impact Scale

**Table S6. Internal consistency reliability: Cronbach's alpha for the HEIS scores and alpha with each item deleted at Week 4**

| HEIS Items                                       | HEIS score (N=240) | HEIS PDAL score (N=240) | HEIS Emb score (N=240) |
|--------------------------------------------------|--------------------|-------------------------|------------------------|
| Cronbach's alpha (total)                         | 0.93               | 0.90                    | 0.89                   |
| <b>Alpha coefficient with each item deleted:</b> |                    |                         |                        |
| Item 1: Quality of sleep                         | 0.92               |                         |                        |
| Item 2: Ability to use products                  | 0.92               | 0.82                    |                        |
| Item 3: Felt embarrassed                         | 0.93               |                         | -                      |
| Item 4: Dislike appearance                       | 0.93               |                         | -                      |
| Item 5: Hard to do housework                     | 0.92               | 0.82                    |                        |
| Item 6: Hard to hold objects                     | 0.93               |                         |                        |
| Item 7: Hard to wash yourself                    | 0.93               | 0.90                    |                        |
| Item 8: Feel frustrated                          | 0.92               |                         |                        |
| Item 9: Hard to work                             | 0.93               |                         |                        |

Emb=Embarrassment with appearance of the hands; HEIS=Hand Eczema Impact Scale; PDAL=Proximal Daily Activity Limitations

**Table S7. Test-retest reliability analysis of the HEIS single item scores**

| Anchor                                     | Timepoint  | n   | Cohen's Kappa (95% CI) |
|--------------------------------------------|------------|-----|------------------------|
| <b>HEIS Item 1: Quality of sleep</b>       |            |     |                        |
| PaGA                                       | Week 12-16 | 116 | 0.78 (0.70, 0.86)      |
|                                            | Week 14-16 | 129 | 0.83 (0.75, 0.91)      |
| IGA-CHE                                    | Week 12-16 | 111 | 0.65 (0.53, 0.78)      |
|                                            | Week 14-16 | 132 | 0.81 (0.73, 0.90)      |
| <b>HEIS Item 8: Feel frustrated</b>        |            |     |                        |
| PaGA                                       | Week 12-16 | 116 | 0.84 (0.78, 0.89)      |
|                                            | Week 14-16 | 129 | 0.86 (0.80, 0.92)      |
| IGA-CHE                                    | Week 12-16 | 111 | 0.78 (0.71, 0.86)      |
|                                            | Week 14-16 | 132 | 0.82 (0.75, 0.89)      |
| QOLHEQ (emotions domain)                   | Week 12-16 | 149 | 0.85 (0.80, 0.90)      |
| <b>HEIS Item 9: Hard to work</b>           |            |     |                        |
| PaGA                                       | Week 12-16 | 116 | 0.79 (0.71, 0.88)      |
|                                            | Week 14-16 | 129 | 0.90 (0.85, 0.95)      |
| IGA-CHE                                    | Week 12-16 | 111 | 0.71 (0.59, 0.84)      |
|                                            | Week 14-16 | 132 | 0.79 (0.68, 0.89)      |
| QOLHEQ (limitations in functioning domain) | Week 12-16 | 163 | 0.82 (0.74, 0.90)      |

CI=Confidence Interval; IGA-CHE=Investigator Global Assessment of Chronic Hand Eczema; PaGA=Patient Global Assessment; QOLHEQ=Quality of Life in Hand Eczema Questionnaire

**Table S8. Known-groups validity analysis of the HEIS PDAL score at Week 6 or Week 8**

| Grouping Variable                                      | n   | Mean HEIS score (SD) | Between groups effect size | Linear trends p-value | Pairwise tests p-value |
|--------------------------------------------------------|-----|----------------------|----------------------------|-----------------------|------------------------|
| <b>Week 6: QOLHEQ total score</b>                      |     |                      |                            |                       |                        |
| < median score                                         | 103 | 0.61 (0.71)          |                            | N/A                   |                        |
| ≥ median score                                         | 111 | 1.76 (1.06)          | -1.27                      |                       | <0.0001                |
| <b>Week 6: QOLHEQ (Item 6: Itch)</b>                   |     |                      |                            |                       |                        |
| < median score                                         | 68  | 0.73 (0.89)          |                            | N/A                   |                        |
| ≥ median score                                         | 146 | 1.42 (1.09)          | -0.67                      |                       | <0.0001                |
| <b>Week 8: PaGA</b>                                    |     |                      |                            |                       |                        |
| 0-1 (clear or almost clear)                            | 44  | 0.41 (0.52)          |                            | <0.0001               |                        |
| 2 (mild)                                               | 100 | 0.99 (0.84)          | -0.77                      |                       | <0.0001                |
| 3-4 (moderate or severe)                               | 74  | 1.99 (1.16)          | -1.62                      |                       | <0.0001                |
| <b>Week 8: IGA-CHE</b>                                 |     |                      |                            |                       |                        |
| 0-1 (clear or almost clear)                            | 49  | 0.65 (0.82)          |                            | <0.0001               |                        |
| 2 (mild)                                               | 99  | 1.12 (0.87)          | -0.55                      |                       | <0.0001                |
| 3-4 (moderate or severe)                               | 70  | 1.73 (1.29)          | -0.96                      |                       | <0.0001                |
| <b>Week 8: DLQI total score</b>                        |     |                      |                            |                       |                        |
| < median score                                         | 96  | 0.51 (0.62)          |                            | N/A                   |                        |
| ≥ median score                                         | 121 | 1.77 (1.06)          | -1.41                      |                       | <0.0001                |
| <b>Week 8: DLQI (Item 1: Itchy, painful, stinging)</b> |     |                      |                            |                       |                        |
| < median score                                         | 25  | 0.47 (0.59)          |                            | N/A                   |                        |

**Table S8. Known-groups validity analysis of the HEIS PDAL score at Week 6 or Week 8**

| Grouping Variable | n   | Mean HEIS score (SD) | Between groups effect size | Linear trends p-value | Pairwise tests p-value |
|-------------------|-----|----------------------|----------------------------|-----------------------|------------------------|
| ≥ median score    | 192 | 1.31 (1.10)          | -0.80                      |                       | <0.0001                |

DLQI=Dermatology Life Quality Index; HEIS=Hand Eczema Impact Scale; IGA-CHE=Investigator Global Assessment of Chronic Hand Eczema; PaGA=Patient Global Assessment; PDAL=Proximal Daily Activity Limitations; QOLHEQ=Quality of Life in Hand Eczema Questionnaire; SD=Standard Deviation

**Table S9. Known-groups validity analysis of the HEIS Emb score at Week 6 or Week 8**

| Grouping Variable                                      | n   | Mean HEIS score (SD) | Between groups effect size | Linear trends p-value | Pairwise tests p-value |
|--------------------------------------------------------|-----|----------------------|----------------------------|-----------------------|------------------------|
| <b>Week 6: QOLHEQ total score</b>                      |     |                      |                            |                       |                        |
| < median score                                         | 103 | 0.64 (0.74)          |                            | N/A                   |                        |
| ≥ median score                                         | 111 | 1.85 (1.206)         | -1.19                      |                       | <0.0001                |
| <b>Week 6: QOLHEQ (Item 6: Itch)</b>                   |     |                      |                            |                       |                        |
| < median score                                         | 68  | 0.67 (0.89)          |                            | N/A                   |                        |
| ≥ median score                                         | 146 | 1.54 (1.19)          | -0.79                      |                       | <0.0001                |
| <b>Week 8: PaGA</b>                                    |     |                      |                            |                       |                        |
| 0-1 (clear or almost clear)                            | 44  | 0.28 (0.38)          |                            | <0.0001               |                        |
| 2 (mild)                                               | 100 | 0.93 (0.80)          | -0.93                      |                       | <0.0001                |
| 3-4 (moderate or severe)                               | 74  | 2.33 (1.11)          | -2.24                      |                       | <0.0001                |
| <b>Week 8: IGA-CHE</b>                                 |     |                      |                            |                       |                        |
| 0-1 (clear or almost clear)                            | 49  | 0.50 (0.70)          |                            | <0.0001               |                        |
| 2 (mild)                                               | 99  | 1.16 (1.03)          | -0.70                      |                       | <0.0001                |
| 3-4 (moderate or severe)                               | 70  | 1.99 (1.22)          | -1.43                      |                       | <0.0001                |
| <b>Week 8: DLQI total score</b>                        |     |                      |                            |                       |                        |
| < median score                                         | 96  | 0.46 (0.54)          |                            | N/A                   |                        |
| ≥ median score                                         | 121 | 1.92 (1.14)          | -1.59                      |                       | <0.0001                |
| <b>Week 8: DLQI (Item 1: Itchy, painful, stinging)</b> |     |                      |                            |                       |                        |
| < median score                                         | 25  | 0.18 (0.32)          |                            | N/A                   |                        |
| ≥ median score                                         | 192 | 1.42 (1.17)          | -1.12                      |                       | <0.0001                |

DLQI=Dermatology Life Quality Index; Emb=Embarrassment with appearance of the hands; HEIS=Hand Eczema Impact Scale; IGA-CHE=Investigator Global Assessment of Chronic Hand Eczema; PaGA=Patient Global Assessment; QOLHEQ=Quality of Life in Hand Eczema Questionnaire; SD=Standard Deviation

**Table S10. Ability of the HEIS PDAL score to detect change between Baseline and Week 16**

| Grouping Variable                                 | n   | Mean change score (SD) | Median change score (Min-Max) | Within groups effect size | Between groups effect size | Between groups p-value |
|---------------------------------------------------|-----|------------------------|-------------------------------|---------------------------|----------------------------|------------------------|
| <b>PaGA</b>                                       |     |                        |                               |                           |                            |                        |
| ≥1 point improvement                              | 134 | -1.42 (0.97)           | -1.33 (-3.7 - 0.7)            | -1.44                     |                            |                        |
| Change score=0                                    | 57  | -0.22 (0.92)           | -0.33 (-1.7 - 2.0)            | -0.18                     | -1.12                      |                        |
| ≥1 point worsening                                | 13  | 0.38 (0.78)            | 0.33 (-0.7 - 2.3)             | 0.39                      | -0.50                      | <.001                  |
| <b>PGI-C</b>                                      |     |                        |                               |                           |                            |                        |
| 'A little better' + 'Much better'                 | 100 | -1.35 (1.03)           | -1.33 (-3.3 - 2.3)            | -1.36                     |                            |                        |
| 'No change'                                       | 20  | 0.12 (0.81)            | 0.00 (-1.7 - 2.0)             | 0.09                      | -1.40                      |                        |
| 'A little worse' + 'Much worse'                   | 6   | 0.39 (1.06)            | 0.17 (-0.7 - 1.7)             | 0.32                      | -0.21                      | <.001                  |
| <b>QOLHEQ (Limitations in functioning domain)</b> |     |                        |                               |                           |                            |                        |
| ≥0.5 SD improvement                               | 116 | -1.55 (0.91)           | -1.67 (-3.7 - 0.7)            | -1.66                     |                            |                        |
| <0.5 SD change                                    | 75  | -0.34 (0.79)           | -0.33 (-2.3 - 1.7)            | -0.29                     | -1.17                      |                        |
| ≥0.5 SD worsening                                 | 13  | 0.56 (1.40)            | 0.33 (-2.7 - 2.3)             | 0.67                      | -0.80                      | <.001                  |

HEIS=Hand Eczema Impact Scale; PaGA=Patient Global Assessment; PDAL=Proximal Daily Activity Limitations; PGI-C=Patient Global Impression of Change; QOLHEQ=Quality of Life in Hand Eczema Questionnaire; SD=Standard Deviation

**Table S11. Ability of the HEIS Emb score to detect change between Baseline and Week 16**

| Grouping Variable                   | n   | Mean change score (SD) | Median change score (Min-Max) | Within groups effect size | Between groups effect size | Between groups p-value |
|-------------------------------------|-----|------------------------|-------------------------------|---------------------------|----------------------------|------------------------|
| <b>PaGA</b>                         |     |                        |                               |                           |                            |                        |
| ≥1 point improvement                | 134 | -1.76 (1.12)           | -2.00 (-4.0 - 2.0)            | -1.65                     |                            |                        |
| Change score=0                      | 57  | -0.46 (0.83)           | -0.50 (-2.0 - 1.0)            | -0.41                     | -1.19                      |                        |
| ≥1 point worsening                  | 13  | 0.35 (1.01)            | 0.50 (-1.5 - 2.0)             | 0.34                      | -0.73                      | <.001                  |
| <b>PGI-C</b>                        |     |                        |                               |                           |                            |                        |
| 'A little better' + 'Much better'   | 100 | -1.72 (1.12)           | -2.00 (-4.0 - 2.0)            | -1.61                     |                            |                        |
| 'No change'                         | 20  | -0.18 (1.00)           | 0.00 (-2.0 - 1.5)             | -0.16                     | -1.44                      |                        |
| 'A little worse' + 'Much worse'     | 6   | -0.25 (0.76)           | -0.25 (-1.0 - 1.0)            | -0.25                     | 0.07                       | <.001                  |
| <b>DLQI (Item 2: Embarrassment)</b> |     |                        |                               |                           |                            |                        |
| ≥1 grade improvement                | 114 | -2.00 (1.04)           | -2.00 (-4.0 - 2.0)            | -2.32                     |                            |                        |
| Change score=0                      | 73  | -0.51 (0.72)           | -0.50 (-2.0 - 1.0)            | -0.43                     | -1.50                      |                        |
| ≥1 grade worsening                  | 17  | 0.35 (0.92)            | 0.50 (-1.5 - 2.0)             | 0.33                      | -0.75                      | <.001                  |
| <b>QOLHEQ (emotions domain)</b>     |     |                        |                               |                           |                            |                        |
| ≥0.5 SD improvement                 | 116 | -1.86 (1.11)           | -2.00 (-4.0 - 1.0)            | -1.79                     |                            |                        |
| <0.5 SD change                      | 74  | -0.62 (0.95)           | -0.50 (-3.5 - 2.0)            | -0.53                     | -1.13                      |                        |
| ≥0.5 SD worsening                   | 14  | 0.21 (0.98)            | 0.50 (-2.5 - 1.5)             | 0.18                      | -0.71                      | <.001                  |

DLQI=Dermatology Life Quality Index; Emb=Embarrassment with appearance of the hands; HEIS=Hand Eczema Impact Scale; PaGA=Patient Global Assessment; PGI-C=Patient Global Impression of Change; QOLHEQ=Quality of Life in Hand Eczema Questionnaire; SD=Standard Deviation

## Supplementary Figures

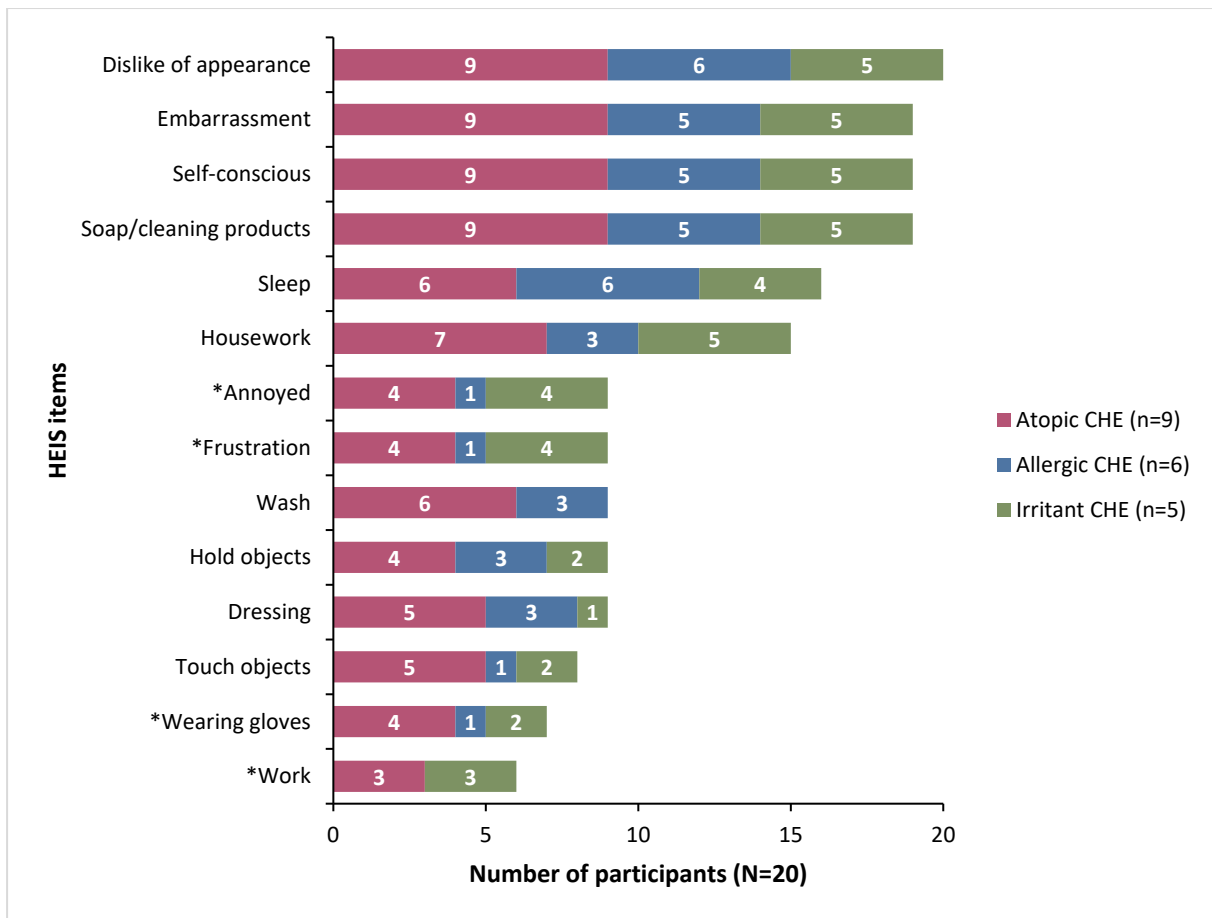

Figure S1. Overall relevance of HEIS items by CHE subtype

\* Items only debriefed in round 2 interviews (n=10)

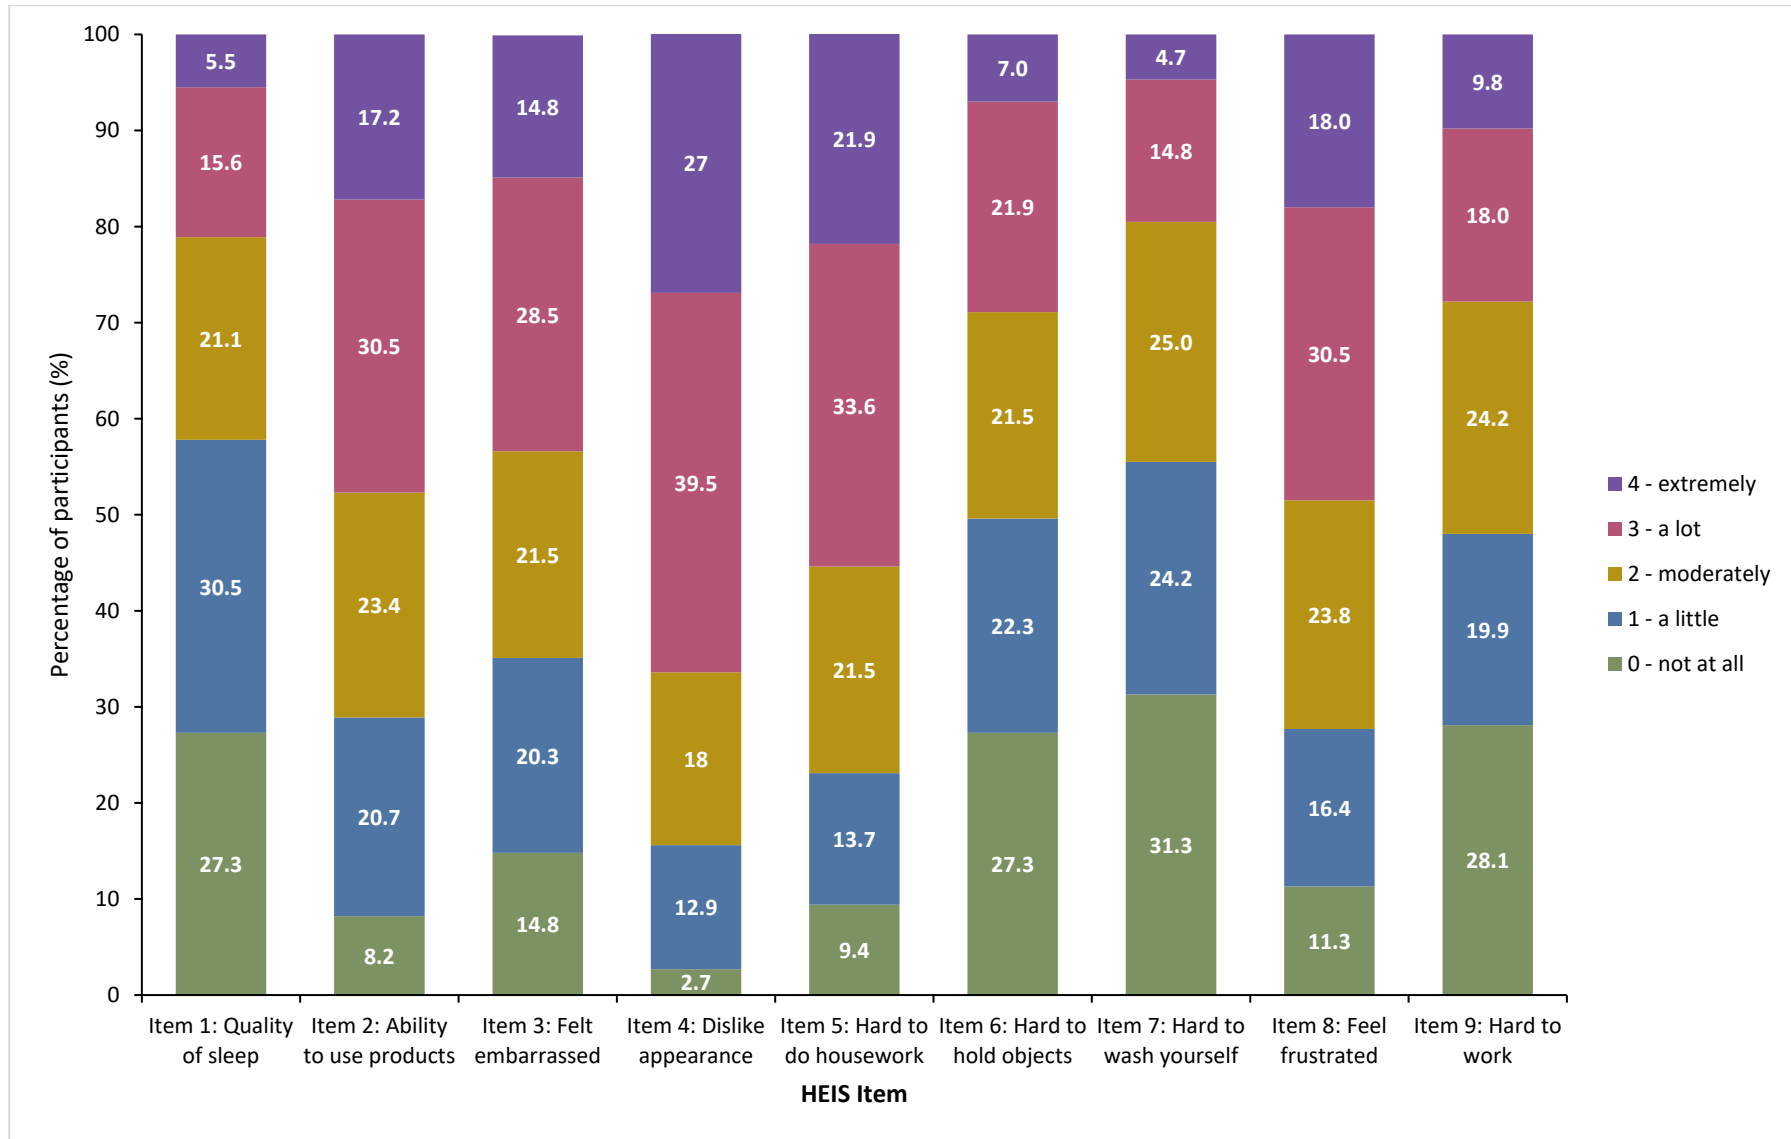

Figure S2. Item response distributions for HEIS at Baseline

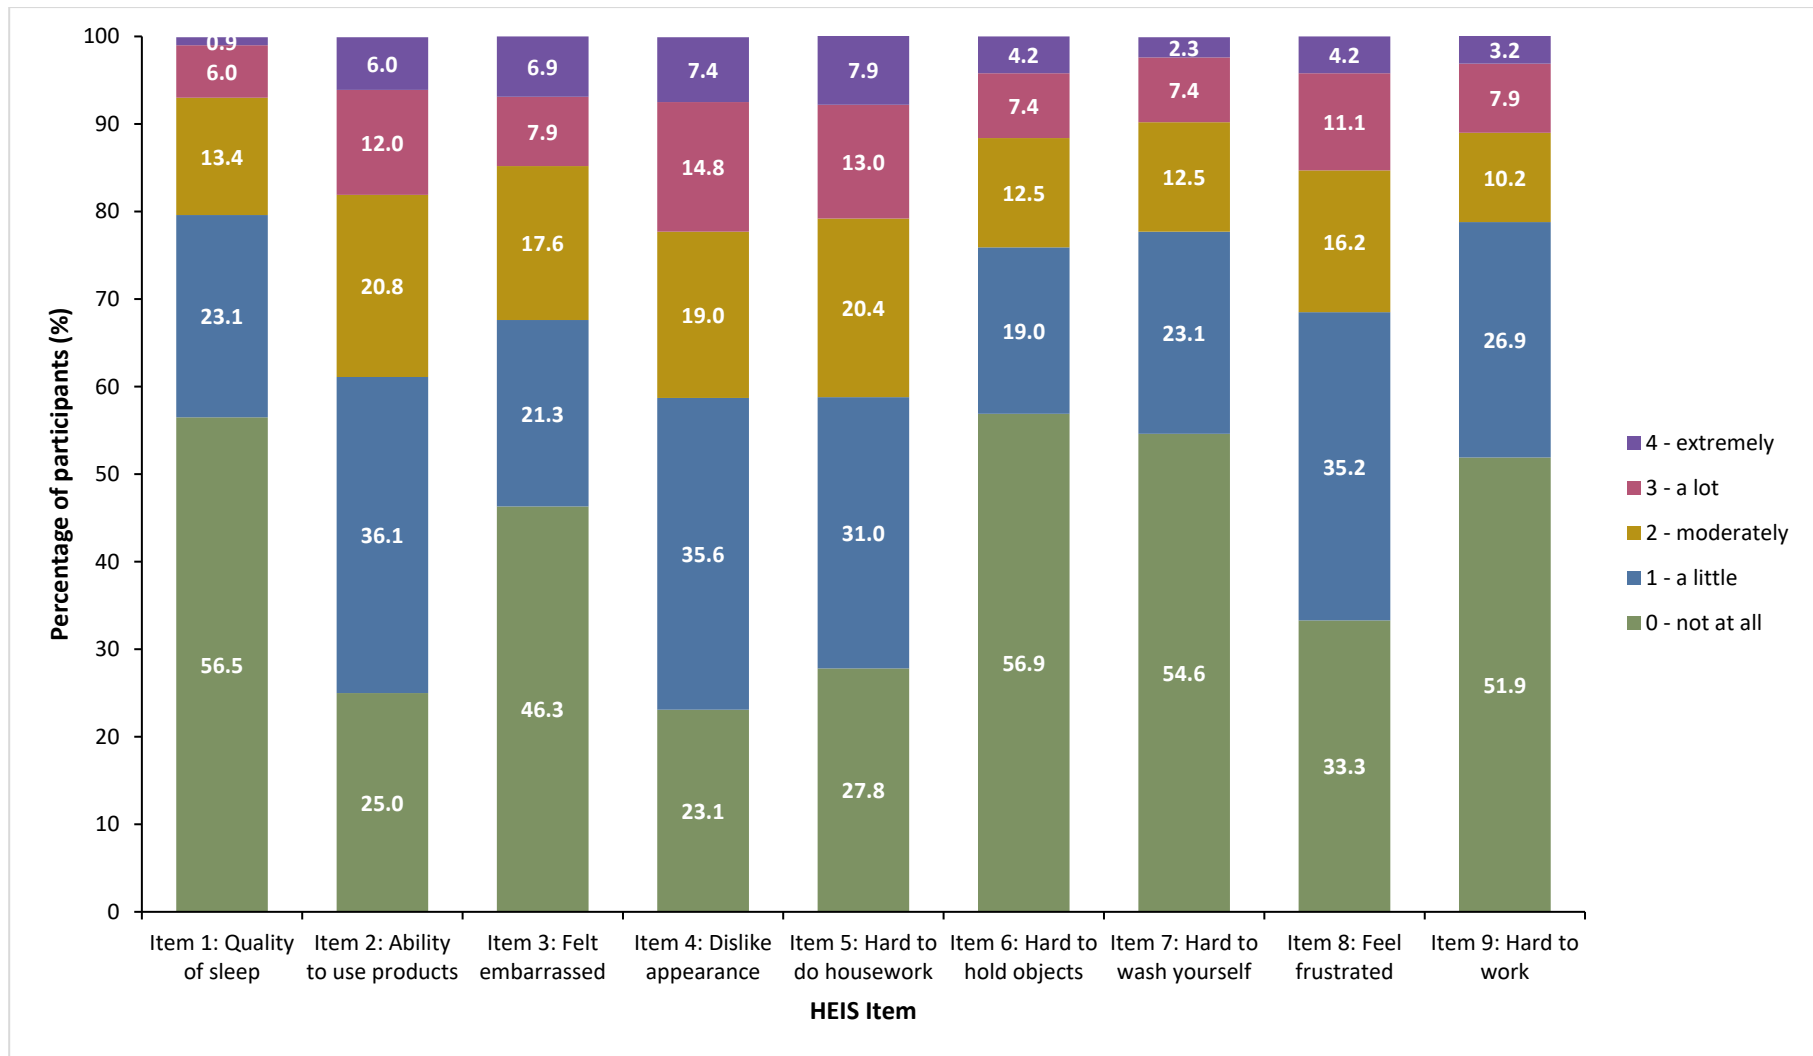

Figure S3. Item response distributions for HEIS at Week 8



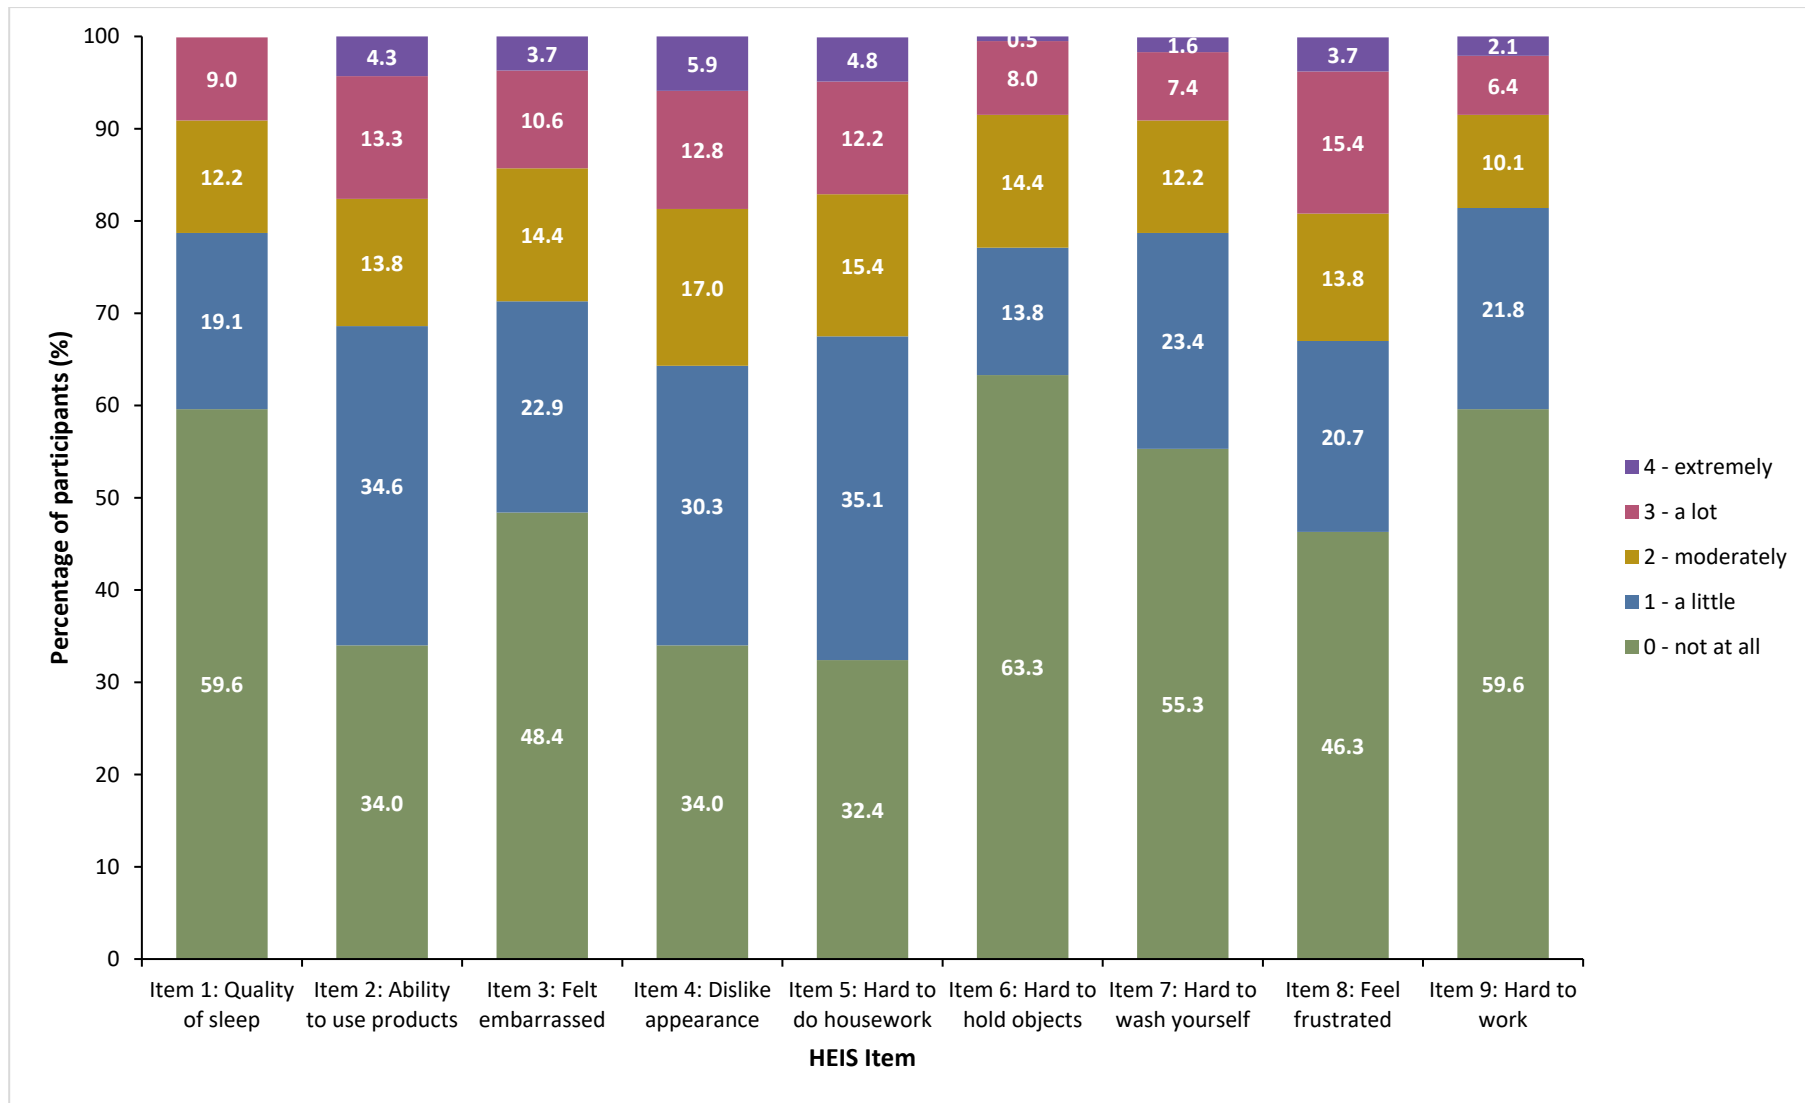

Figure S4. Item response distributions for HEIS at Week 16

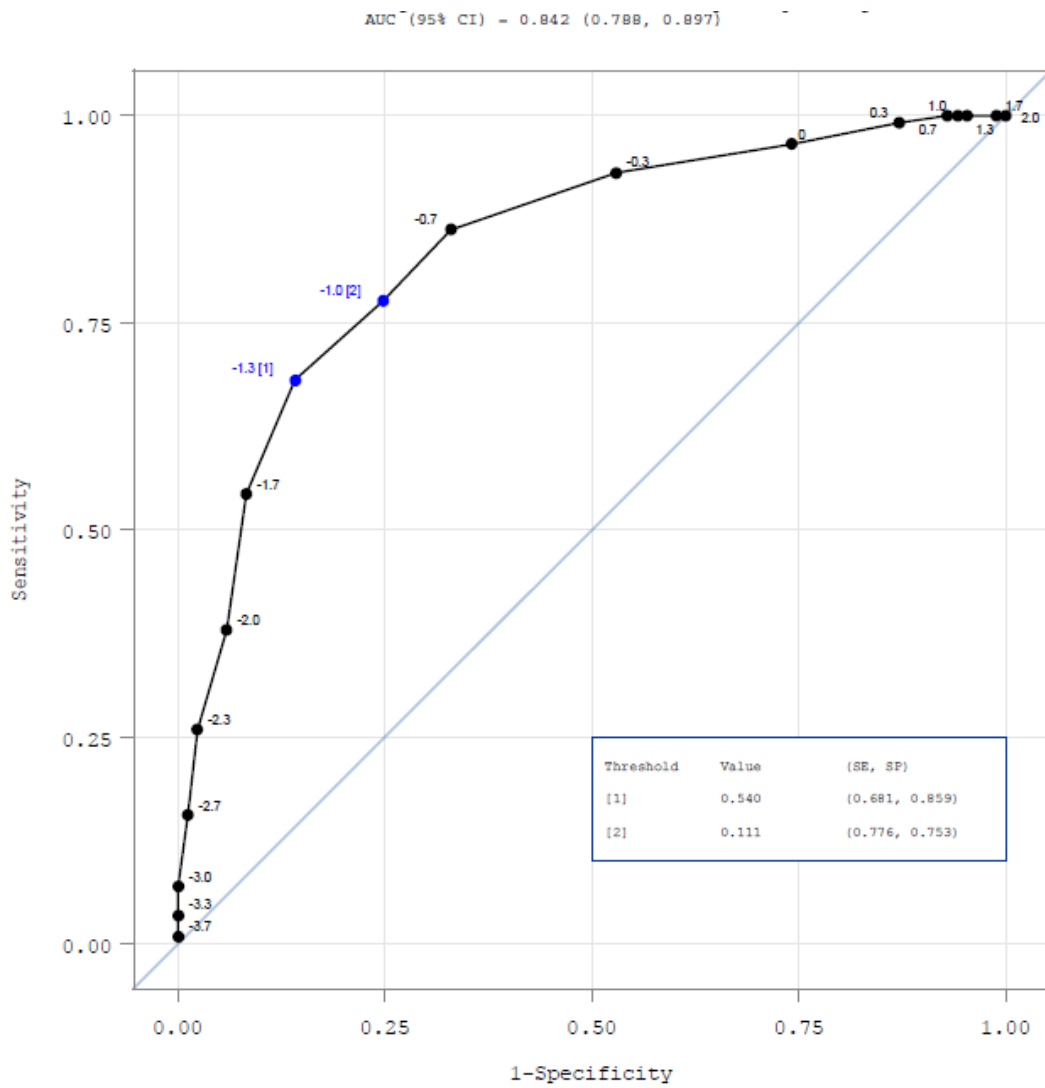

AUC=Area Under the Curve; CI=Confidence Interval; SE=Sensitivity; SP=Specificity

**Figure S5. ROC analyses of change from Baseline in HEIS PDAL score predicting QOLHEQ (limitations in functioning domain) Baseline to Week 16 responder status**

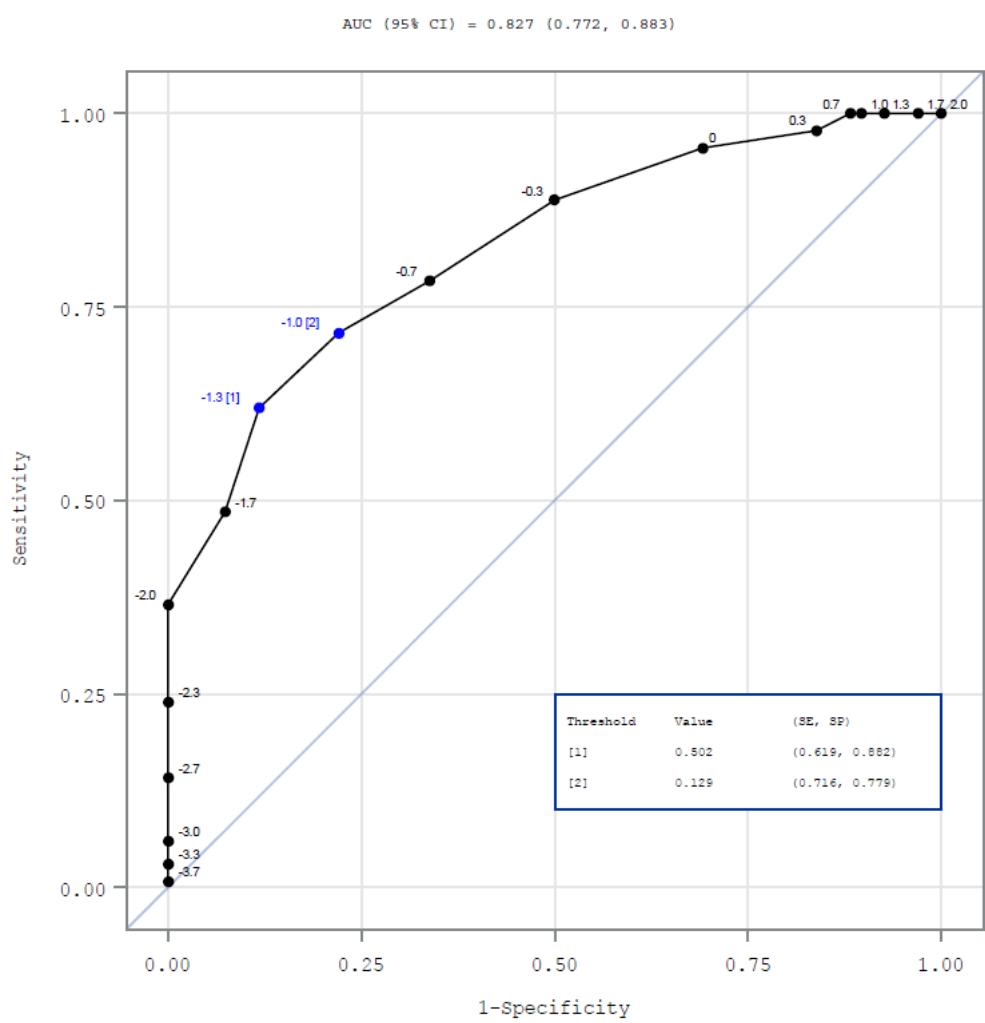

AUC=Area Under the Curve; CI=Confidence Interval; SE=Sensitivity; SP=Specificity

**Figure S6. ROC analyses of change from Baseline in HEIS PDAL score predicting PaGA Baseline to Week 16 responder status**

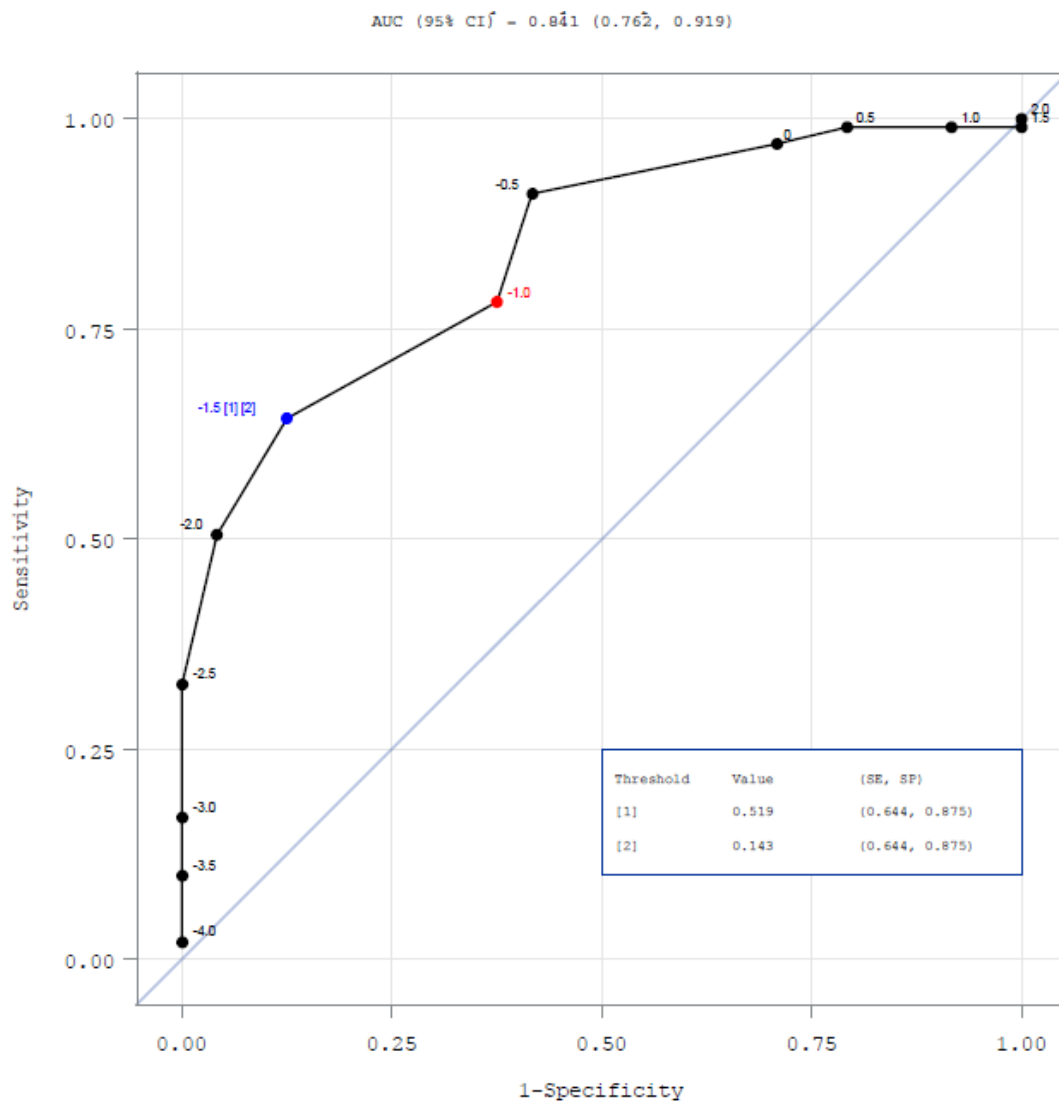

AUC=Area Under the Curve; CI=Confidence Interval; SE=Sensitivity; SP=Specificity

**Figure S7. ROC analyses of change from Baseline in HEIS Emb score predicting PGI-C Baseline to Week 16 responder status**

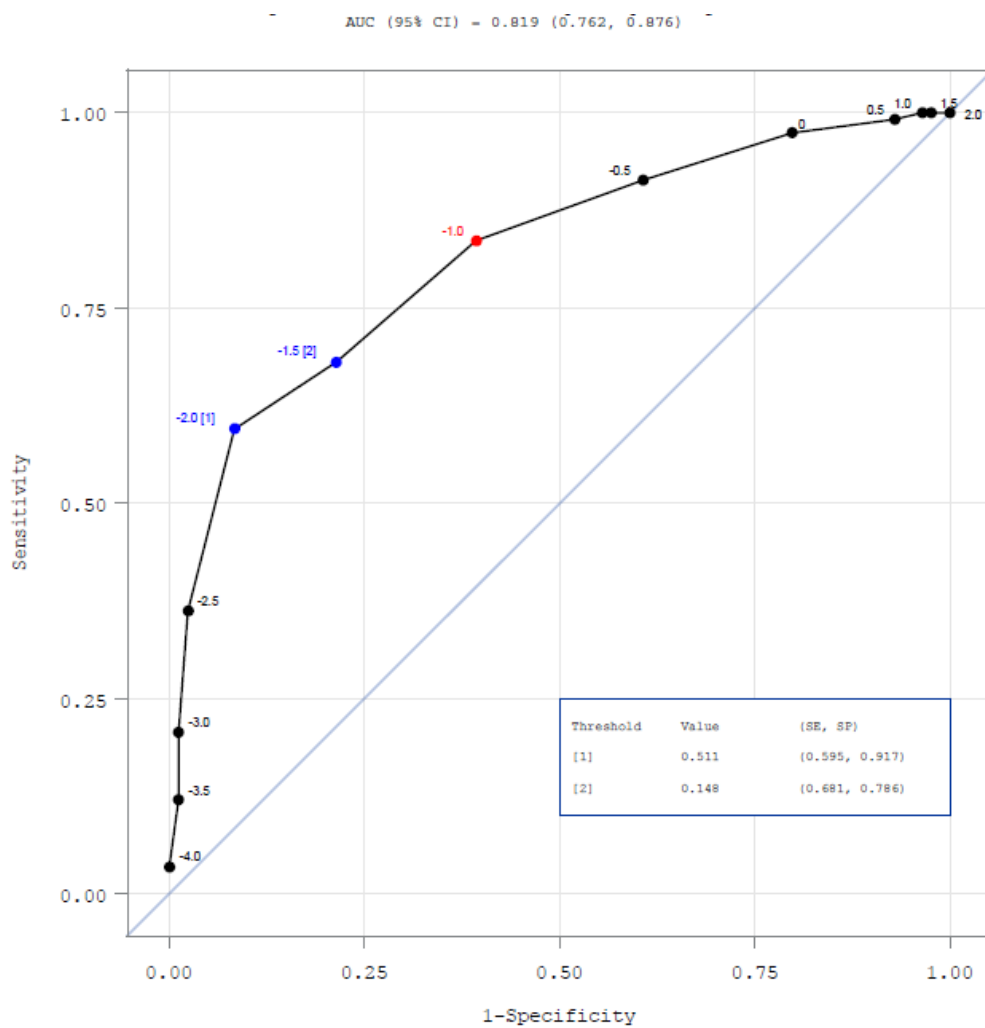

AUC=Area Under the Curve; CI=Confidence Interval; SE=Sensitivity; SP=Specificity

**Figure S8. ROC analyses of change from Baseline in HEIS Emb score predicting QOLHEQ (emotions domain) Baseline to Week 16 responder status**

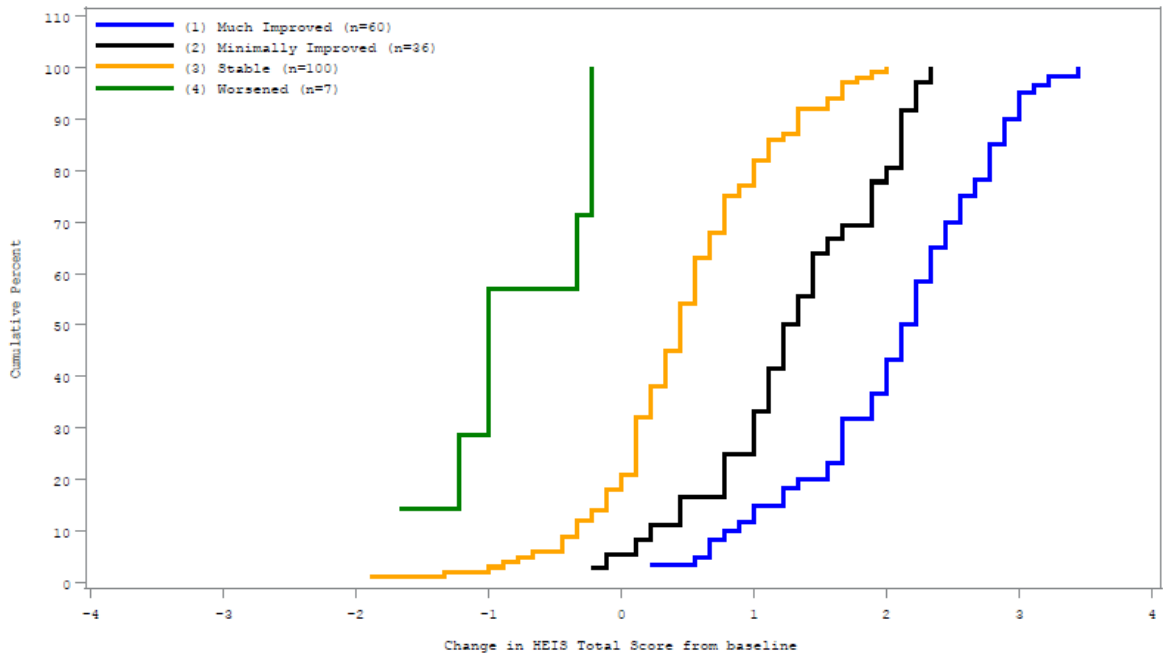

Figure S9. Empirical cumulative frequency distribution function for change in HEIS score by DLQI (total score) from Baseline to Week 16

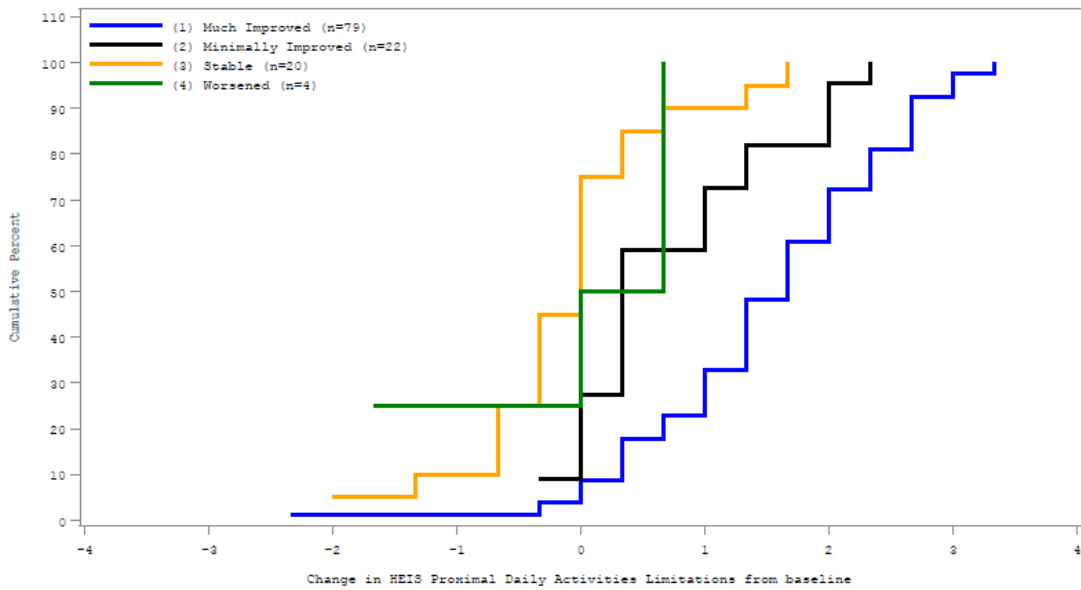

Figure S10. Empirical cumulative frequency distribution function for change in HEIS PDAL score by PGI-C from Baseline to Week 16

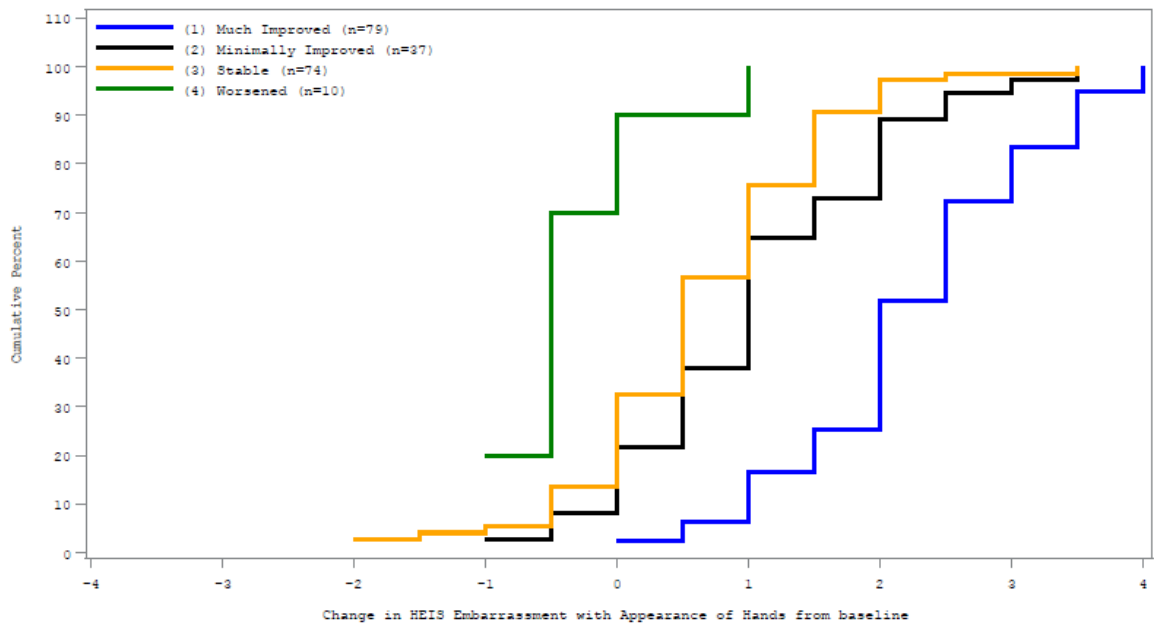

**Figure S11. Empirical cumulative frequency distribution function for change in HEIS Emb score by QOLHEQ (emotions domain) from Baseline to Week 16**

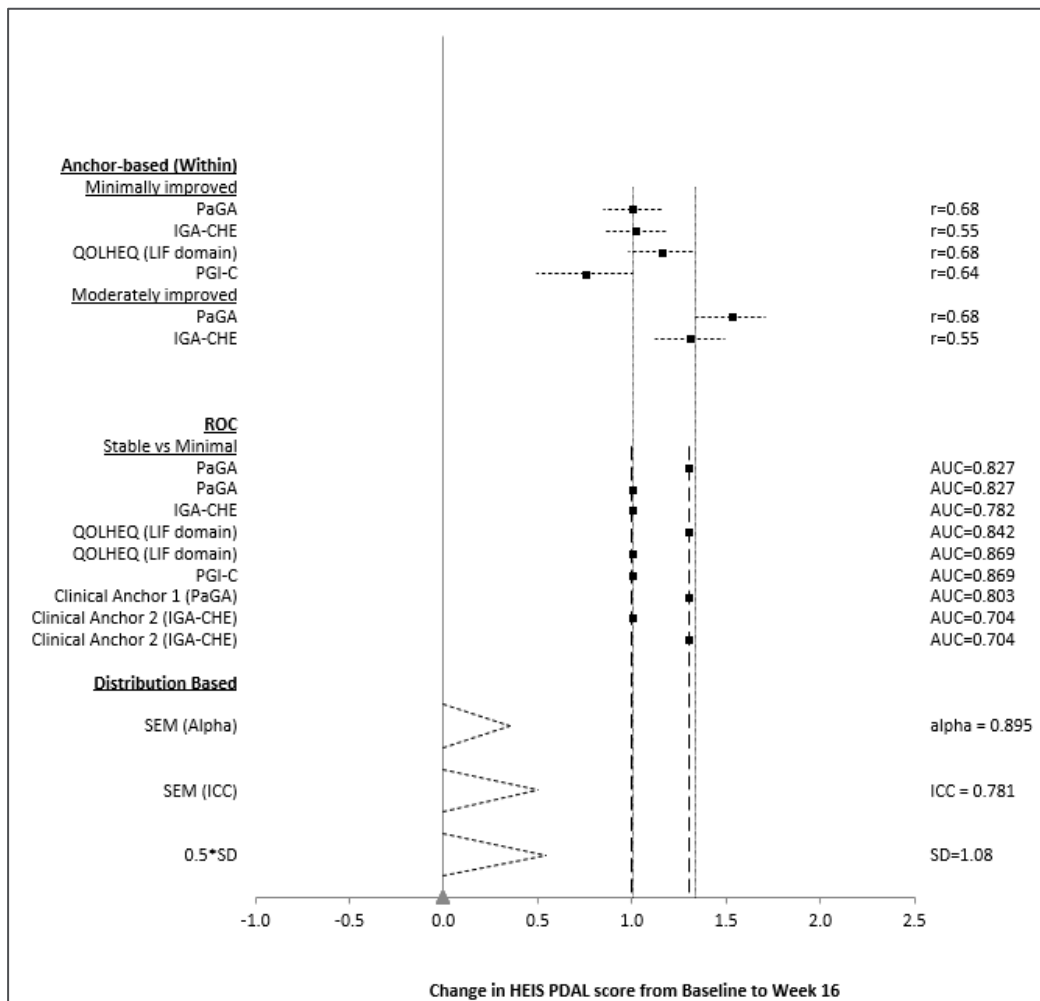

ICC=Intraclass Correlation Coefficients; IGA-CHE=Investigator Global Assessment of Chronic Hand Eczema; LIF=Limitations in Functioning; PaGA=Patient Global Assessment of Disease Severity; PGI-C=Patient Global Impression of Change; QOLHEQ=Quality of Life in Hand Eczema Questionnaire; SD=Standard Deviation; SEM=Standard Error of Measurement

**Figure S12. Forest plot showing estimated responder definitions for the HEIS PDAL score**



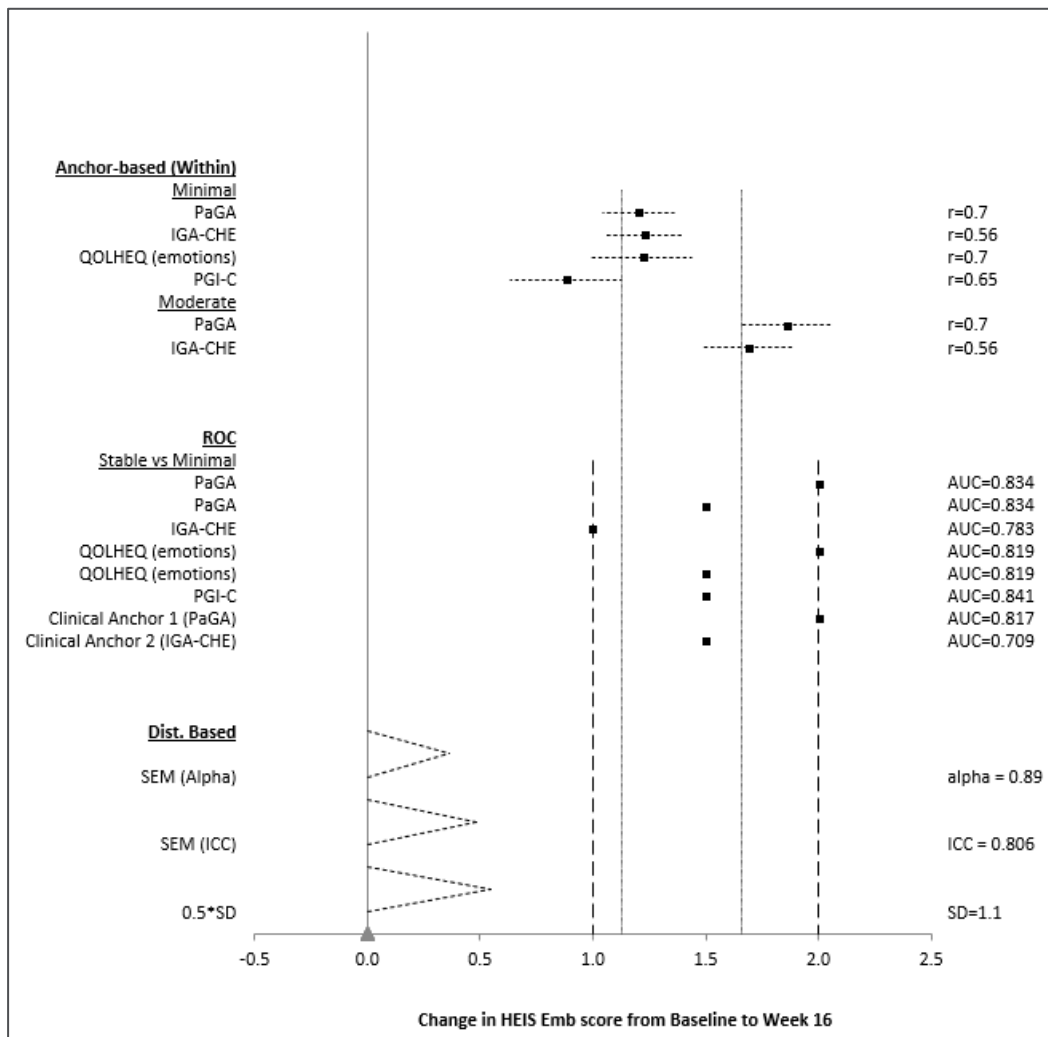

ICC=Intraclass Correlation Coefficients; IGA-CHE=Investigator Global Assessment of Chronic Hand Eczema; PaGA=Patient Global Assessment of Disease Severity; PGI-C=Patient Global Impression of Change; QOLHEQ=Quality of Life in Hand Eczema Questionnaire; SD=Standard Deviation; SEM=Standard Error of Measurement

**Figure S13. Forest plot showing estimated responder definitions for the HEIS Emb score**
